# Supplementary material
Source: publisher figshare collection journal article supplement (https://frontiersin.figshare.com/ndownloader/files/14747282)
Supplement: Supplementary file [file 14747282]

|          |                                           |             |              |                        |                |                                               |
|----------|-------------------------------------------|-------------|--------------|------------------------|----------------|-----------------------------------------------|
| <b>A</b> | <b>KEGG Pathway Term</b>                  | <b>Hsa#</b> | <b>Count</b> | <b>Fold Enrichment</b> | <b>p-value</b> | <b>Genes</b>                                  |
|          | Antigen processing and presentation       | 04612       | 6            | 7.8                    | 8.32E-04       | <i>KLRC2, KLRC3, TAP1, IFI30, CTSL, KLRC1</i> |
|          | Arginine and proline metabolism           | 00330       | 4            | 8.1                    | 0.01           | <i>GLS2, ODC1, GLS, MAOB</i>                  |
|          | Natural killer cell mediated cytotoxicity | 04650       | 5            | 4.0                    | 0.03           | <i>CD48, KLRC2, KLRC3, ITGB2, KLRC1</i>       |
|          | D-Glutamine and D-glutamate metabolism    | 00471       | 2            | 54.0                   | 0.03           | <i>GLS2, GLS</i>                              |

|          |                                      |             |              |                        |                |                                                                                                                       |
|----------|--------------------------------------|-------------|--------------|------------------------|----------------|-----------------------------------------------------------------------------------------------------------------------|
| <b>B</b> | <b>Biological Process term</b>       | <b>GO #</b> | <b>Count</b> | <b>Fold Enrichment</b> | <b>p-value</b> | <b>Genes</b>                                                                                                          |
|          | Cellular defense response            | 0006968     | 7            | 18.5                   | 1.88E-06       | <i>KLRC2, LGALS3BP, KLRC3, TRAC, RELA, GNLY, CCR2, TRD@</i>                                                           |
|          | Defense response                     | 0006952     | 16           | 4.2                    | 4.25E-06       | <i>TF, KLRC2, KLRC3, RELA, GNLY, RNASE6, APOBEC3G, ITGB2, TRD@, CD163, CD1D, CD48, LGALS3BP, TRAC, F3, TAP1, CCR2</i> |
|          | Immune response                      | 0006955     | 13           | 3.0                    | 9.77E-04       | <i>CRTAM, RELA, CD1A, APOBEC3G, OAS1, OAS2, TRIM22, PSMB8, AIM2, CD1D, TAP1, CCR2, LILRB4</i>                         |
|          | Response to virus                    | 0009615     | 5            | 7.4                    | 0.004          | <i>PLSCR1, RELA, APOBEC3G, STAT1, TRIM22</i>                                                                          |
|          | Cell morphogenesis                   | 0000902     | 8            | 3.6                    | 0.006          | <i>SEMA5A, CAP2, CD3G, ERBB3, LAMA5, NDC80, GAS1, FEZ2</i>                                                            |
|          | Antigen processing and presentation  | 0019882     | 4            | 7.8                    | 0.01           | <i>IFI30, CD1A, PSMB8, CD1D</i>                                                                                       |
|          | Response to wounding                 | 0009611     | 9            | 2.7                    | 0.01           | <i>TF, PLSCR1, ERBB3, RELA, F3, CCR2, ITGB2, PLAUI, CD163</i>                                                         |
|          | Regulation of cell proliferation     | 0042127     | 11           | 2.3                    | 0.02           | <i>FGFR2, ODC1, HDAC1, ERBB3, LAMA5, RELA, F3, IFI30, GAS1, STAT1, PLAUI</i>                                          |
|          | Cell motion                          | 0006928     | 8            | 2.7                    | 0.02           | <i>SEMA5A, APOA1, LAMA5, PODXL, ITGB2, GAS1, FEZ2, PLAUI</i>                                                          |
|          | Response to organic cyclic substance | 0014070     | 4            | 5.3                    | 0.03           | <i>TF, PLIN2, RELA, STAT1</i>                                                                                         |

|                         |         |    |     |      |                                                                          |
|-------------------------|---------|----|-----|------|--------------------------------------------------------------------------|
| T cell activation       | 0042110 | 4  | 5.1 | 0.04 | <i>CD48, CRTAM, CD3G, CD1D</i>                                           |
| Inflammatory response   | 0006954 | 6  | 3.0 | 0.04 | <i>TF, RELA, F3, CCR2, ITGB2, CD163</i>                                  |
| Regulation of apoptosis | 0042981 | 10 | 2.0 | 0.05 | <i>CASP10, CRTAM, CD3G, HDAC1, ERBB3, RELA, F3, GAS1, TNFAIP3, STAT1</i> |

**Supplementary Table 8. Functional annotation and pathway analysis.** The 87 overlapping CCLE blood and lesional skin DEGs were used in this analysis. The table summarizes enriched **(A)** KEGG pathways and **(B)** GO (Gene Ontology) biological processes.

**Running title:** Interactome analysis: Cutaneous lupus- **Dey-Rao and Sinha, 2018**
